# Supplementary material for: Patient Portals Facilitating Engagement With Inpatient Electronic Medical Records: A Systematic Review
Source: PubMed Central journal article supplement (PMC6482406; doi:10.2196/12779), 2019-04-11
Supplement: jmir_v21i4e12779_app1.pdf [file jmir_v21i4e12779_app1.pdf]

Multimedia Appendix 1: Search terms for the PubMed, CINAHL and Embase databases.

## PubMed

**Keywords:** patient engagement, consumer engagement; electronic health records, electronic medical records, patient portal

**MeSH terms:** patient participation, electronic health records, patient portals

### PubMed Search:

*(("patient participation"[MeSH] OR "consumer engagement" OR "patient engagement")) AND ("electronic health records"[MeSH] OR "electronic health records"[tiab] OR "electronic medical records"[tiab] OR "patient portals"[MeSH] OR "patient portals"[tiab])*

## CINAHL

**Keywords:** patient engagement, consumer engagement, patient participation, electronic health record, electronic medical record, patient portal

**CINAHL Headings:** consumer participation, electronic health records

### CINAHL search:

*((MH"consumer participation") OR "patient engagement" OR "consumer engagement") AND ((MH"electronic health record") OR "electronic health record\*" OR "electronic medical record\*" OR "patient portal")*

## Embase

**Keywords:** patient engagement, consumer engagement, patient participation, electronic health record, electronic medical record, patient portal

**Emtree terms:** Electronic health record, electronic medical record, Patient participation,

### Embase search:

*(('patient engagement'/exp OR 'patient participation'/exp OR 'patient engagement' OR 'patient participation' OR 'consumer engagement') AND ('electronic health record'/exp OR 'electronic health record\*':ti,ab OR 'electronic medical record\*':ti,ab OR 'patient portal':ti,ab))*

## Abbreviations

MeSH: Medical Subject Heading

tiab: Title/Abstract (PubMed)

ti,ab: Title/Abstract (Embase)

MH: Medical Heading
